# Supplementary material
Source: PubMed Central journal article supplement (PMC9780161)
Supplement: NIHMS1838665-supplement-1.pdf [file NIHMS1838665-supplement-1.pdf]

**Figure S1.** Overall processes of clinical model feature selection. **Panel A** summarizes the whole process. **Panel B** represents details of intersection of important features identified by different machine learning algorithms.

LR =logistic regression; RF =random forest, SVM =Support Vector Machine; XGBoost =extreme gradient boosting

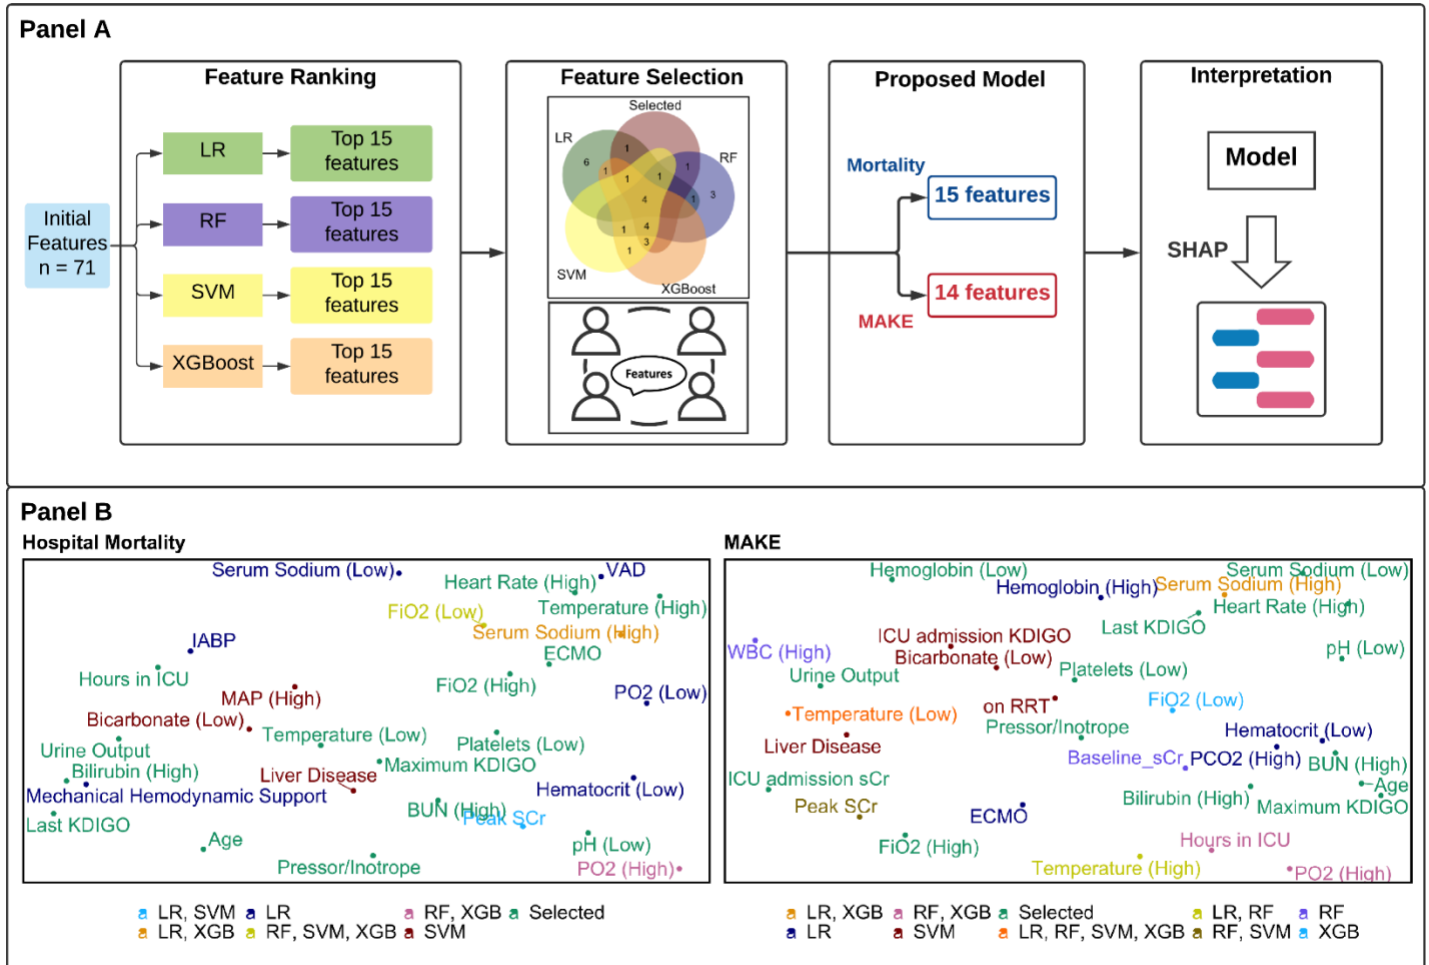

**Figure S2.** Case studies of SHAP framework with real feature data according to AKI severity and mortality status. The base value is the mean predicted risk probability.  $f(x)$  is the predicted probability of the outcome. Red color (moves probability to the right/higher risk) and blue color (moves probability to the left/lower risk) represent how each feature impact the predicted probability of the outcome.

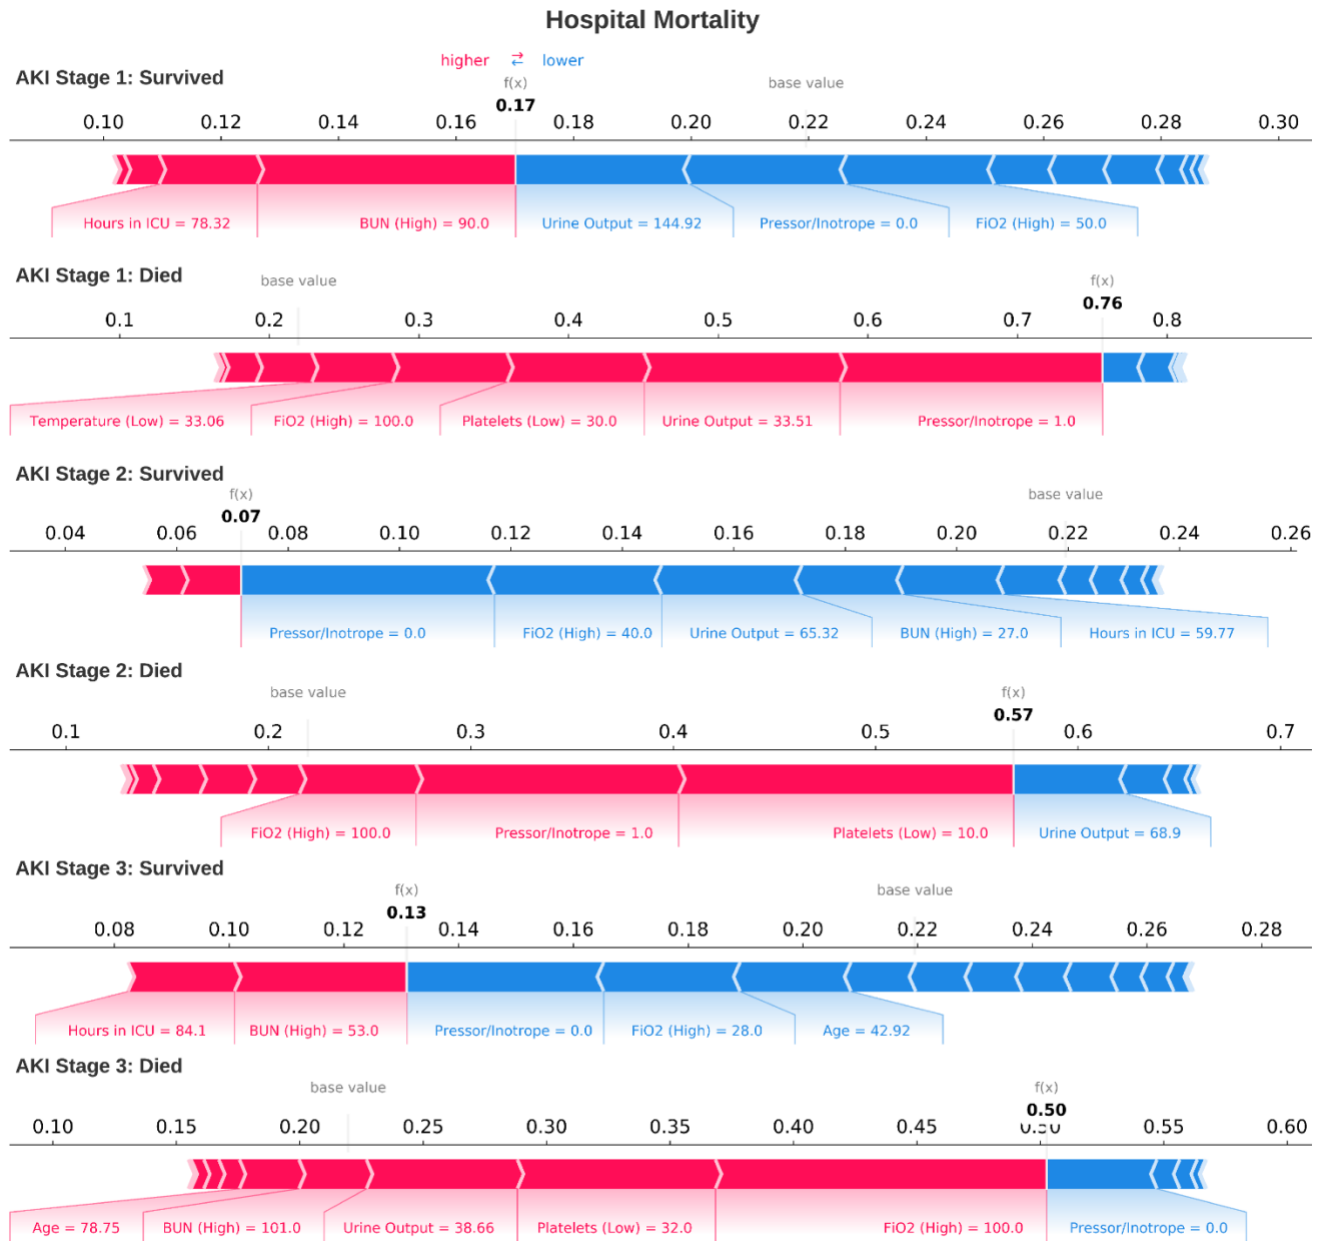

**Figure S3.** Case studies of SHAP framework with real feature data according to AKI severity and MAKE outcome. The base value is the mean predicted risk probability.  $f(x)$  is the predicted probability of the outcome. Red color (moves probability to the right/higher risk) and blue color (moves probability to the left/lower risk) represent how each feature impact the predicted probability of the outcome.

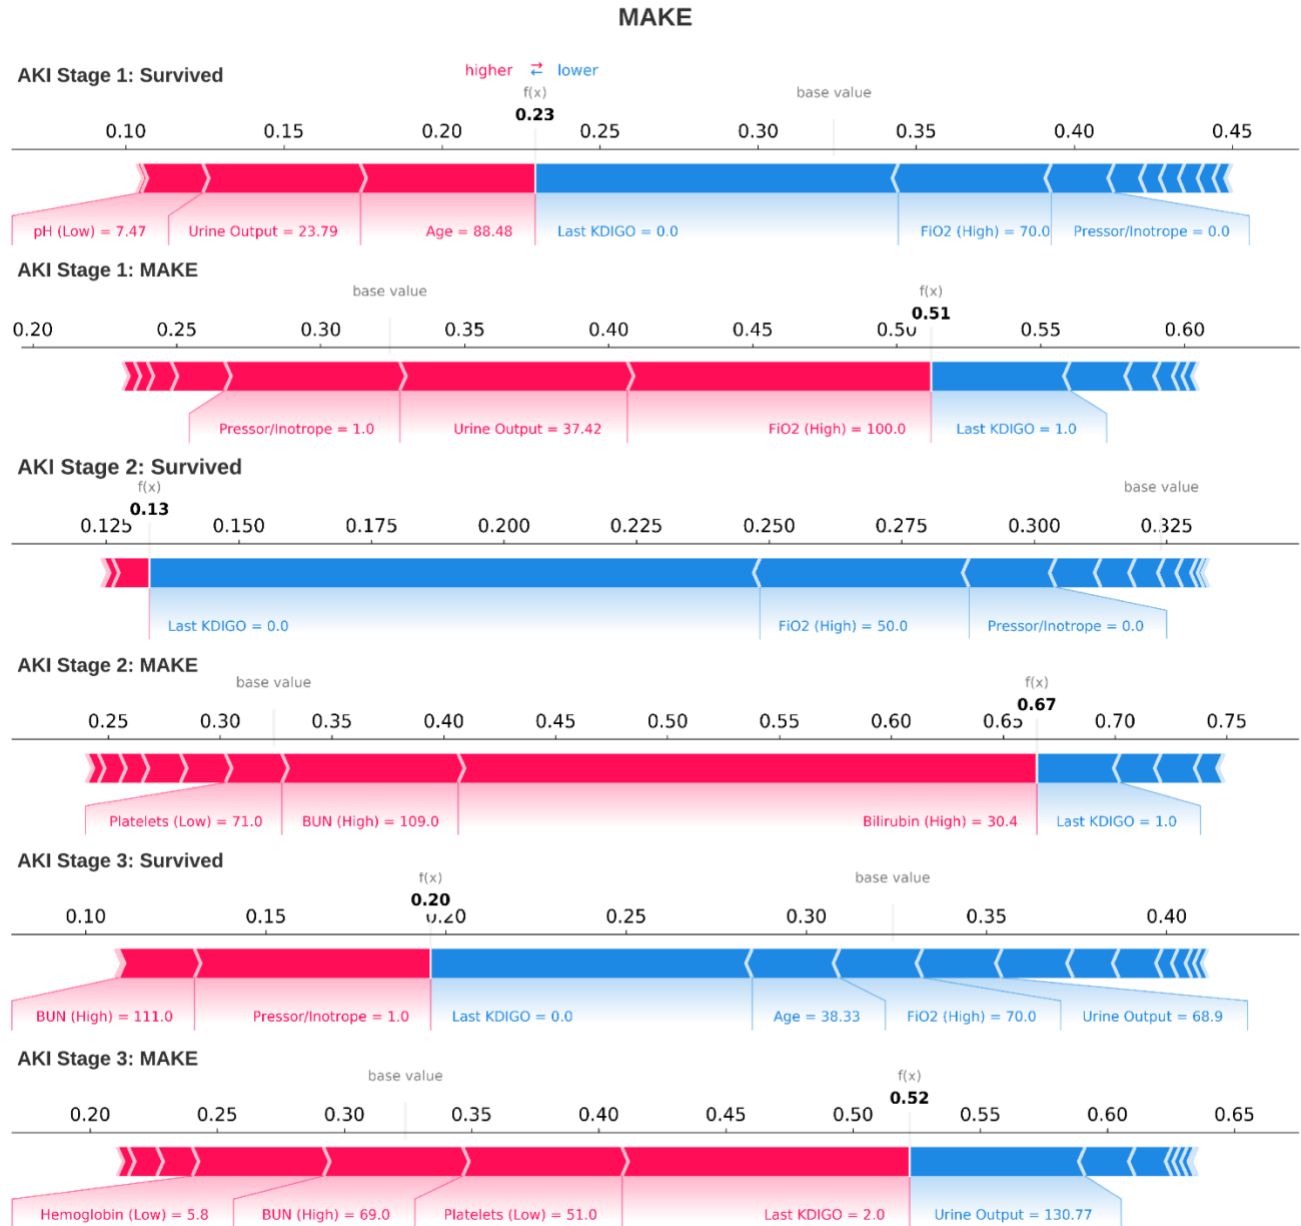

**Table S1.** Definitions and data management procedures of all validated clinical features considered for the development of the clinical models

| Feature            | Definition                                                                                                                                                                                                 | Units             | UKY constraints   | UTSW constraints  | UKY Missing Data | UTSW Missing Data |
|--------------------|------------------------------------------------------------------------------------------------------------------------------------------------------------------------------------------------------------|-------------------|-------------------|-------------------|------------------|-------------------|
| ICU admission sCr  | First sCr after ICU admission                                                                                                                                                                              | mg/dL             | -                 | -                 | 0 (0.00%)        | 0 (0.00%)         |
| Age                | Age at admission                                                                                                                                                                                           | Years             | -                 | -                 | 0 (0.00%)        | 0 (0.00%)         |
| Anemia             | If Male:<br>- Lowest Hematocrit < 39% or<br>- Lowest Hemoglobin < 18 g/dL<br>If Female:<br>- Lowest Hematocrit < 36% or<br>- Lowest Hemoglobin < 12 g/dL                                                   | boolean           | -                 | -                 | 24<br>(0.33%)    | 27<br>(1.21%)     |
| Baseline sCr       | a. The outpatient sCr closest to 7 days before hospital admission up to 1 year.<br>b. If no outpatient sCr (a.), then use the inpatient sCr value closet to 7 days before hospital admission up to 1 year. | mg/dL             | -                 | -                 | 5348<br>(72.72%) | 1124<br>(50.34%)  |
| Bicarbonate (Low)  | Lowest Value ICU D0-D3                                                                                                                                                                                     | mmol/L            | Remove: <5, >50   | Remove: <5, >50   | 32<br>(0.44%)    | 7<br>(0.31%)      |
| Bicarbonate (High) | Highest Value ICU D0-D3                                                                                                                                                                                    | mmol/L            | -                 | Remove: <5, >50   | 3 (0.04%)        | 7<br>(0.31%)      |
| Bilirubin (High)   | Highest Value ICU D0-D3                                                                                                                                                                                    | mg/dL             | -                 | -                 | 2085<br>(28.35%) | 762<br>(34.12%)   |
| BMI                | Weight / (Height) <sup>2</sup> at Admission                                                                                                                                                                | kg/m <sup>2</sup> | -                 | -                 | 3428<br>(46.61%) | 1460<br>(65.38%)  |
| BUN                | Highest Value ICU D0-D3                                                                                                                                                                                    | mg/dL             | Remove: <5        | Remove: <5        | 3<br>(0.04%)     | 9<br>(0.40%)      |
| FiO2 (Low)         | Lowest Value ICU D0-D3                                                                                                                                                                                     | %                 | Remove: <21, >100 | Remove: <21, >100 | 2096<br>(28.5%)  | 529<br>(23.69%)   |
| FiO2 (High)        | Highest Value ICU D0-D3                                                                                                                                                                                    | %                 | Remove: <21, >100 | Remove: <21, >100 | 1810<br>(24.61%) | 525<br>(23.51%)   |
| Fluid Overload     | (Total Fluid Input - Total Fluid Output) *100/ Weight ICU D0-D3                                                                                                                                            | (L – L) /(kg) %   | -                 | -                 | 2863<br>(38.93%) | 523<br>(23.42%)   |

Neyra et al, *AJKD*, "Prediction of Mortality and Major Adverse Kidney Events in Critically Ill Patients With Acute Kidney Injury"

|                                                                                                                     |                              |                        |                                         |                                                            |                |                |
|---------------------------------------------------------------------------------------------------------------------|------------------------------|------------------------|-----------------------------------------|------------------------------------------------------------|----------------|----------------|
| Gender                                                                                                              | Male/Female at admission     | 1 = Male<br>0 = Female | -                                       | -                                                          | 0 (0.00%)      | 0 (0.00%)      |
| Heart Rate (Low)                                                                                                    | Lowest Value ICU D0-D3       | bpm                    | Remove: <25                             | Remove: <25                                                | 190<br>(2.58%) | 17<br>(0.76%)  |
| Heart Rate (High)                                                                                                   | Highest Value ICU D0-D3      | bpm                    | Remove: <25                             | Remove: <25                                                | 6 (0.08%)      | 17<br>(0.76%)  |
| Hematocrit (Low)                                                                                                    | Lowest Value ICU D0-D3       | %                      | -                                       | -                                                          | 23<br>(0.31%)  | 25<br>(1.12%)  |
| Hematocrit (High)                                                                                                   | Highest Value ICU D0-D3      | %                      | -                                       | -                                                          | 23<br>(0.31%)  | 25<br>(1.12%)  |
| Hemoglobin (Low)                                                                                                    | Lowest Value ICU D0-D3       | g/dL                   | -                                       | -                                                          | 23<br>(0.31%)  | 20<br>(0.90%)  |
| Hemoglobin (High)                                                                                                   | Highest Value ICU D0-D3      | g/dL                   | -                                       | -                                                          | 23<br>(0.31%)  | 20<br>(0.90%)  |
| ECMO                                                                                                                | Use in ICU D0-D3             | boolean                | -                                       | -                                                          | 0 (0.00%)      | 0 (0.00%)      |
| IABP                                                                                                                | Use in ICU D0-D3             | boolean                | -                                       | -                                                          | 0 (0.00%)      | 0 (0.00%)      |
| Mechanical Ventilation                                                                                              | Use in ICU D0-D3             | boolean                | -                                       | -                                                          | 0 (0.00%)      | 0 (0.00%)      |
| VAD                                                                                                                 | Use in ICU D0-D3             | boolean                | -                                       | -                                                          | 0 (0.00%)      | 0 (0.00%)      |
| MAP (Low)                                                                                                           | Lowest Value ICU D0-D3       | mmHg                   | Remove: <0,<br>Bottom 5th<br>Percentile | Remove: Bottom<br>5th Percentile,<br>Top 5th<br>Percentile | 434<br>(5.90%) | 108<br>(4.84%) |
| MAP (High)                                                                                                          | Highest Value ICU D0-D3      | mmHg                   | Remove: <0,<br>Top 5th<br>Percentile    | Remove: Bottom<br>5th Percentile,<br>Top 5th<br>Percentile | 379<br>(5.15%) | 106<br>(4.75%) |
| Admission KDIGO Score                                                                                               | KDIGO score at ICU admission | KDIGO                  | -                                       | -                                                          | 0 (0.00%)      | 0 (0.00%)      |
| Nephrotoxin: ACEI, ARB,<br>aminoglycoside, NSAIDs                                                                   | Use in ICU D0-D3             | boolean                | -                                       | -                                                          | 0 (0.00%)      | 0 (0.00%)      |
| Pressor/inotrope: dopamine,<br>dobutamine, milrinone, epinephrine,<br>norepinephrine, phenylephrine,<br>vasopressin | Use in ICU D0-D3             | boolean                | -                                       | -                                                          | 0 (0.00%)      | 81<br>(3.63%)  |

Neyra et al, *AJKD*, "Prediction of Mortality and Major Adverse Kidney Events in Critically Ill Patients With Acute Kidney Injury"

|                         |                                                 |                           |                            |                              |               |               |
|-------------------------|-------------------------------------------------|---------------------------|----------------------------|------------------------------|---------------|---------------|
| pCO <sub>2</sub> (Low)  | Lowest Value ICU D0-D3                          | mmHg                      | Remove: <0, >125           | Remove: >125                 | 1401 (19.05%) | 1738 (77.83%) |
| pCO <sub>2</sub> (High) | Highest Value ICU D0-D3                         | mmHg                      | Remove: <0, >125           | Remove: >125                 | 1409 (19.16%) | 1738 (77.83%) |
| Peak sCr                | Highest Value ICU D0-D3                         | mg/dL                     | -                          | -                            | 0 (0.00%)     | 0 (0.00%)     |
| pH (Low)                | Lowest Value ICU D0-D3                          | -                         | -                          | -                            | 1400 (19.04%) | 1737 (77.79%) |
| pH (High)               | Highest Value ICU D0-D3                         | -                         | -                          | -                            | 1400 (19.04%) | 1737 (77.79%) |
| Platelets               | Lowest Value ICU D0-D3                          | k/uL                      | -                          | -                            | 34 (0.46%)    | 32 (1.43%)    |
| pO <sub>2</sub> (Low)   | Lowest Value ICU D0-D3                          | mmHg                      | -                          | -                            | 1400 (19.04%) | 1788 (80.07%) |
| pO <sub>2</sub> (High)  | Highest Value ICU D0-D3                         | mmHg                      | -                          | -                            | 1400 (19.04%) | 1788 (80.07%) |
| Potassium (Low)         | Lowest Value ICU D0-D3                          | mmol/L                    | Remove: Top 5th Percentile | -                            | 418 (5.68%)   | 6 (0.27%)     |
| Potassium (High)        | Highest Value ICU D0-D3                         | mmol/L                    | Remove: Top 5th Percentile | -                            | 376 (5.11%)   | 6 (0.27%)     |
| Race                    | Race at admission                               | 0=White, 1=Black, 2=Other | -                          | -                            | 0 (0.00%)     | 0 (0.00%)     |
| Respiration (Low)       | Lowest Value ICU D0-D3                          | rpm                       | Remove: <5, >70            | Remove: <5, >70              | 1098 (14.93%) | 25 (1.12%)    |
| Respiration (High)      | Highest Value ICU D0-D3                         | rpm                       | Remove: <5, >70            | Remove: <5, >70              | 172 (2.34%)   | 20 (0.9%)     |
| Septic                  | Sepsis diagnosis before/at admission            | boolean                   | -                          | -                            | 0 (0.00%)     | 0 (0.00%)     |
| Serum Sodium (Low)      | Lowest Value ICU D0-D3                          | mmol/L                    | -                          | -                            | 3 (0.04%)     | 6 (0.27%)     |
| Serum Sodium (High)     | Highest Value ICU D0-D3                         | mmol/L                    | -                          | -                            | 3 (0.04%)     | 6 (0.27%)     |
| Temperature (Low)       | Lowest Value ICU D0-D3                          | °C                        | Remove: <30, >45           | Remove: <30, >45             | 79 (1.07%)    | 17 (0.76%)    |
| Temperature (High)      | Highest Value ICU D0-D3                         | °C                        | Remove: <30, >45           | Remove: <30, >45             | 19 (0.26%)    | 17 (0.76%)    |
| Urine Output            | Total urine output ICU D0-D3 / measurement time | ml/hr                     | Remove: Top 5th Percentile | Remove: Top 2.5th Percentile | 858 (11.67%)  | 105 (4.7%)    |

Neyra et al, *AJKD*, "Prediction of Mortality and Major Adverse Kidney Events in Critically Ill Patients With Acute Kidney Injury"

|                                |                                                                                                                                                                                                                 |                                                    |                                                   |                                                     |                  |                  |
|--------------------------------|-----------------------------------------------------------------------------------------------------------------------------------------------------------------------------------------------------------------|----------------------------------------------------|---------------------------------------------------|-----------------------------------------------------|------------------|------------------|
| Urine Flow                     | Total urine output ICU D0-D3 / weight / measurement time                                                                                                                                                        | ml/kg/hr                                           | -                                                 | -                                                   | 3226<br>(43.87%) | 253<br>(11.33%)  |
| WBC (Low)                      | Lowest Value ICU D0-D3                                                                                                                                                                                          | k/uL                                               | Remove: Top 5th Percentile                        | Remove: Bottom 2.5th Percentile, Top 5th Percentile | 408<br>(5.55%)   | 145<br>(6.49%)   |
| WBC (High)                     | Highest Value ICU D0-D3                                                                                                                                                                                         | k/uL                                               | Remove: Top 5th Percentile                        | Remove: Bottom 2.5th Percentile, Top 5th Percentile | 409<br>(5.56%)   | 160<br>(7.17%)   |
| Height                         | At admission/Average                                                                                                                                                                                            | meters                                             | Remove: Bottom 5th Percentile, Top 5th Percentile | Remove: Bottom 5th Percentile, Top 5th Percentile   | 3384<br>(46.02%) | 1453<br>(65.07%) |
| Weight                         | At admission                                                                                                                                                                                                    | kg                                                 | Remove: <30, >200                                 | Remove: <30, >200                                   | 2862<br>(38.92%) | 173<br>(7.75%)   |
| Hours in ICU                   | Hours in ICU D0-D3                                                                                                                                                                                              | hours                                              | -                                                 | -                                                   | 0 (0.00%)        | 0 (0.00%)        |
| Mechanical Hemodynamic Support | Use of VAD, IABP, or ECMO in ICU D0-D3                                                                                                                                                                          | boolean                                            | -                                                 | -                                                   | 0 (0.00%)        | 0 (0.00%)        |
| Unplanned Admission            | Patient did not have planned surgery/treatment                                                                                                                                                                  | boolean                                            | -                                                 | -                                                   | 0 (0.00%)        | 0 (0.00%)        |
| Maximum KDIGO Score            | Maximum KDIGO score in ICU D0-D3                                                                                                                                                                                | KDIGO                                              | -                                                 | -                                                   | 0 (0.00%)        | 0 (0.00%)        |
| RRT Administration             | No RRT - HD Only - CRRT (w/ or w/out HD) in ICU D0-D3                                                                                                                                                           | 0=None,<br>1= HD Only,<br>2= CRRT (w/ or w/out HD) | -                                                 | -                                                   | 0 (0.00%)        | 0 (0.00%)        |
| Last KDIGO                     | Last KDIGO score in ICU D0-D3                                                                                                                                                                                   | KDIGO                                              | -                                                 | -                                                   | 0 (0.00%)        | 0 (0.00%)        |
| Congestive Heart Failure       | <b>ICD9:</b> 398.91, 402.01, 402.11, 402.91, 404.01, 404.03, 404.11, 404.13, 404.91, 404.93, 425.4 - 425.9, 428.x<br><b>ICD10:</b> I09.9, I11.0, I13.0, I13.2, I25.5, I42.0, I42.5 - I42.9, I43.x, I50.x, P29.0 | boolean                                            | -                                                 | -                                                   | 0 (0.00%)        | 0 (0.00%)        |
| Peripheral Vascular Disease    | <b>ICD9:</b> 093.0, 437.3, 440.x, 441.x, 443.1 - 443.9, 447.1, 557.1, 557.9, V43.4                                                                                                                              | boolean                                            | -                                                 | -                                                   | 0 (0.00%)        | 0 (0.00%)        |

Neyra et al, *AJKD*, "Prediction of Mortality and Major Adverse Kidney Events in Critically Ill Patients With Acute Kidney Injury"

|                                         |                                                                                                                                                                                                                                                                                      |         |   |   |           |           |
|-----------------------------------------|--------------------------------------------------------------------------------------------------------------------------------------------------------------------------------------------------------------------------------------------------------------------------------------|---------|---|---|-----------|-----------|
|                                         | <b>ICD10:</b> I70.x, I71.x, I73.1, I73.8, I73.9, I77.1, I79.0, I79.2, K55.1, K55.8, K55.9, Z95.8, Z95.9                                                                                                                                                                              |         |   |   |           |           |
| Hypertension (Uncomplicated)            | <b>ICD9:</b> 401.x<br><b>ICD10:</b> I10.                                                                                                                                                                                                                                             | boolean | - | - | 0 (0.00%) | 0 (0.00%) |
| Hypertension (Complicated)              | <b>ICD9:</b> 402.x - 405.x<br><b>ICD10:</b> I11.x - I13.x, I15.x                                                                                                                                                                                                                     | boolean | - | - | 0 (0.00%) | 0 (0.00%) |
| Chronic Pulmonary Disease               | <b>ICD9:</b> 416.8, 416.9, 490.x - 505.x, 506.4, 508.1, 508.8<br><b>ICD10:</b> I27.8, I27.9, J40.x - J47.x, J60.x - J67.x, J68.4, J70.1, J70.3                                                                                                                                       | boolean | - | - | 0 (0.00%) | 0 (0.00%) |
| Diabetes (Without Chronic Complication) | <b>ICD9:</b> 250.0 - 250.3<br><b>ICD10:</b> E10.0, E10.1, E10.9, E11.0, E11.1, E11.9, E12.0, E12.1, E12.9, E13.0, E13.1, E13.9, E14.0, E14.1, E14.9                                                                                                                                  | boolean | - | - | 0 (0.00%) | 0 (0.00%) |
| Diabetes (With Chronic Complication)    | <b>ICD9:</b> 250.4 - 250.9<br><b>ICD10:</b> E10.2 - E10.8, E11.2 - E11.8, E12.2 - E12.8, E13.2 - E13.8, E14.2 - E14.8                                                                                                                                                                | boolean | - | - | 0 (0.00%) | 0 (0.00%) |
| Liver Disease                           | <b>ICD9:</b> 070.22, 070.23, 070.32, 070.33, 070.44, 070.54, 070.6, 070.9, 456.0 - 456.2, 570.x, 571.x, 572.2 - 572.8, 573.3, 573.4, 573.8, 573.9, V42.7<br><b>ICD10:</b> B18.x, I85.x, I86.4, I98.2, K70.x, K71.1, K71.3 - K71.5, K71.7, K72.x - K74.x, K76.0, K76.2 - K76.9, Z94.4 | boolean | - | - | 0 (0.00%) | 0 (0.00%) |
| Peptic Ulcer Disease                    | <b>ICD9:</b> 531.7, 531.9, 532.7, 532.9, 533.7, 533.9, 534.7, 534.9<br><b>ICD10:</b> K25.7, K25.9, K26.7, K26.9, K27.7, K27.9, K28.7, K28.9                                                                                                                                          | boolean | - | - | 0 (0.00%) | 0 (0.00%) |
| Aids/HIV                                | <b>ICD9:</b> 042.x - 044.x<br><b>ICD10:</b> B20.x - B22.x, B24.x                                                                                                                                                                                                                     | boolean | - | - | 0 (0.00%) | 0 (0.00%) |
| Metastatic Solid Tumor                  | <b>ICD9:</b> 196.x - 199.x<br><b>ICD10:</b> C77.x - C80.x                                                                                                                                                                                                                            | boolean | - | - | 0 (0.00%) | 0 (0.00%) |



Neyra et al, *AJKD*, "Prediction of Mortality and Major Adverse Kidney Events in Critically Ill Patients With Acute Kidney Injury"

|                   |                                                                                                                                                                                                                                                                      |         |   |   |           |           |
|-------------------|----------------------------------------------------------------------------------------------------------------------------------------------------------------------------------------------------------------------------------------------------------------------|---------|---|---|-----------|-----------|
| Rheumatic Disease | <p><b>ICD9:</b> 446.x, 701.0, 710.0 - 710.4, 710.8, 710.9, 711.2, 714.x, 719.3, 720.x, 725.x, 728.5, 728.89, 729.30</p> <p><b>ICD10:</b> L94.0, L94.1, L94.3, M05.x, M06.x, M08.x, M12.0, M12.3, M30.x, M31.0 - M31.3, M32.x - M35.x, M45.x, M46.1, M46.8, M46.9</p> | boolean | - | - | 0 (0.00%) | 0 (0.00%) |
| Depression        | <p><b>ICD9:</b> 296.2, 296.3, 296.5, 300.4, 309.x, 311</p> <p><b>ICD10:</b> F20.4, F31.3 - F31.5, F32.x, F33.x, F34.1, F41.2, F43.2</p>                                                                                                                              | boolean | - | - | 0 (0.00%) | 0 (0.00%) |

*Abbreviations: ACEI (angiotensin-converting enzyme inhibitors), ARB (angiotensin II receptor blockers), BMI (body mass index), bpm (beats per minute), BUN (blood urea nitrogen), CRRT (continuous renal replacement therapy), D0-D3 (day 0 through day 3 of ICU admission), ECMO (extracorporeal membrane oxygenation), HD (hemodialysis), IABP (intra-aortic balloon pump), ICD (international statistical classification of diseases and related health problems), ICU (intensive care unit), KDIGO (kidney disease improving global outcomes), MAP (mean arterial pressure), NSAIDs (nonsteroidal anti-inflammatory drugs), RRT (renal replacement therapy), sCr (serum creatinine), VAD (ventricular assist device), WBC (white blood cells).*

**Table S2.** Top 15 clinical features ranked by each machine learning algorithm for the prediction of A) hospital mortality and B) MAKE. Features are ordered by the absolute value of beta-coefficient or importance score. Features that are bolded are the final 15 ones selected after interpretation and explainability procedures.

| LR                             |           | Random Forest             |        | SVM                      |        | XGBoost                   |        |
|--------------------------------|-----------|---------------------------|--------|--------------------------|--------|---------------------------|--------|
| Feature                        | Beta-Coef | Feature                   | Score  | Feature                  | Score  | Feature                   | Score  |
| <b>A. Hospital mortality</b>   |           |                           |        |                          |        |                           |        |
| Peak sCr                       | -4.57     | <b>Urine Output</b>       | 100.00 | <b>Last KDIGO</b>        | 100.00 | <b>Pressor/inotrope</b>   | 100.00 |
| Serum Sodium (High)            | 4.19      | <b>Pressor/inotrope</b>   | 71.71  | <b>Urine Output</b>      | 92.14  | <b>Urine Output</b>       | 84.12  |
| <b>ECMO</b>                    | 3.70      | <b>FiO2 (High)</b>        | 62.98  | <b>Pressor/inotrope</b>  | 82.07  | <b>FiO2 (High)</b>        | 56.39  |
| IABP                           | 3.05      | <b>Hours in ICU</b>       | 60.99  | <b>Maximum KDIGO</b>     | 72.91  | <b>Age</b>                | 47.81  |
| VAD                            | -2.89     | <b>Temperature (Low)</b>  | 59.25  | <b>Platelets (Low)</b>   | 71.76  | <b>Last KDIGO</b>         | 44.07  |
| <b>Platelets (Low)</b>         | -2.84     | <b>Platelets (Low)</b>    | 58.33  | <b>FiO2 (High)</b>       | 71.47  | <b>Hours in ICU</b>       | 43.63  |
| <b>Bilirubin (High)</b>        | 2.81      | <b>Age</b>                | 55.91  | <b>Temperature (Low)</b> | 70.42  | FiO2 (Low)                | 42.24  |
| Serum Sodium (Low)             | -2.63     | <b>BUN (High)</b>         | 52.59  | <b>BUN (High)</b>        | 66.23  | <b>Temperature (Low)</b>  | 42.09  |
| <b>Temperature (High)</b>      | 2.44      | <b>Heart Rate (High)</b>  | 47.48  | <b>Bilirubin (High)</b>  | 65.69  | <b>Platelets (Low)</b>    | 39.54  |
| Mechanical Hemodynamic Support | -2.38     | <b>Last KDIGO</b>         | 45.46  | Liver Disease            | 64.19  | <b>BUN (High)</b>         | 37.54  |
| Hematocrit (Low)               | 2.33      | <b>pH (Low)</b>           | 44.22  | <b>Heart Rate (High)</b> | 62.23  | <b>Heart Rate (High)</b>  | 32.05  |
| PO2 (Low)                      | 2.33      | <b>Temperature (High)</b> | 44.18  | Bicarbonate (Low)        | 61.60  | <b>Temperature (High)</b> | 30.77  |
| <b>Temperature (Low)</b>       | -2.33     | FiO2 (Low)                | 44.05  | FiO2 (Low)               | 61.56  | PO2 (High)                | 30.05  |
| <b>Heart Rate (High)</b>       | 2.30      | PO2 (High)                | 44.03  | Peak sCr                 | 56.63  | <b>pH (Low)</b>           | 24.79  |
| <b>BUN (High)</b>              | 2.29      | <b>Bilirubin (High)</b>   | 40.20  | MAP (High)               | 56.57  | Serum Sodium (High)       | 24.05  |
| <b>B. MAKE</b>                 |           |                           |        |                          |        |                           |        |
| Serum Sodium (High)            | 3.30      | <b>Last KDIGO</b>         | 100.00 | <b>Last KDIGO</b>        | 100.00 | <b>Last KDIGO</b>         | 100.00 |
| Hematocrit (Low)               | 2.98      | <b>Urine Output</b>       | 75.20  | <b>Maximum KDIGO</b>     | 79.58  | <b>Urine Output</b>       | 38.19  |
| <b>Bilirubin (High)</b>        | 2.81      | <b>BUN (High)</b>         | 53.93  | <b>Urine Output</b>      | 72.25  | <b>Age</b>                | 24.50  |
| <b>Hemoglobin (Low)</b>        | -2.45     | <b>Age</b>                | 50.46  | <b>BUN (High)</b>        | 71.39  | <b>BUN (High)</b>         | 17.76  |
| <b>Serum Sodium (Low)</b>      | -2.29     | <b>Platelets (Low)</b>    | 43.15  | Peak sCr                 | 66.73  | <b>FiO2 (High)</b>        | 17.47  |
| <b>Last KDIGO</b>              | 2.28      | Hours in ICU              | 42.24  | <b>Pressor/inotrope</b>  | 51.91  | <b>Platelets (Low)</b>    | 14.63  |
| <b>ICU admission sCr</b>       | -2.15     | Temperature (Low)         | 38.60  | Temperature (Low)        | 48.93  | Hours in ICU              | 14.05  |
| Hemoglobin (High)              | -2.13     | Peak sCr                  | 34.53  | On RRT                   | 48.75  | <b>Pressor/inotrope</b>   | 13.92  |
| <b>Age</b>                     | 1.89      | <b>Heart Rate (High)</b>  | 33.03  | <b>Hemoglobin (Low)</b>  | 45.61  | Temperature (Low)         | 13.54  |
| Temperature (Low)              | -1.87     | Temperature (High)        | 31.88  | ICU admission KDIGO      | 45.32  | PO2 (High)                | 10.03  |
| <b>BUN (High)</b>              | 1.81      | <b>FiO2 (High)</b>        | 31.77  | <b>Platelets (Low)</b>   | 44.08  | <b>Heart Rate (High)</b>  | 9.60   |
| <b>Heart Rate (High)</b>       | 1.75      | WBC_D1_HIGH               | 31.17  | Bicarbonate (Low)        | 43.80  | FiO2 (Low)                | 9.13   |
| ECMO                           | 1.72      | PO2 (High)                | 30.68  | Liver Disease            | 42.70  | <b>pH (Low)</b>           | 9.04   |
| PCO2 (High)                    | 1.49      | Baseline sCr              | 30.66  | <b>ICU admission sCr</b> | 42.49  | <b>Bilirubin (High)</b>   | 8.93   |
| Temperature (High)             | 1.44      | <b>ICU admission sCr</b>  | 30.08  | <b>FiO2 (High)</b>       | 42.13  | Serum Sodium (High)       | 8.57   |

Abbreviations: BUN (blood urea nitrogen), ECMO (extracorporeal membrane oxygenation), IABP (intra-aortic balloon pump), ICU (intensive care unit), KDIGO (Kidney Disease Improving Global Outcomes), LR (logistic regression), MAKE (major adverse kidney events), MAP (mean arterial pressure), RRT (renal replacement therapy), sCr (serum creatinine), SVM (support vector machine), VAD (ventricular assist device), WBC (white blood cells).

**Table S3.** Machine learning algorithms of feature selection for the clinical models of A) hospital mortality and B) MAKE supporting its applicability and reproducibility

|                                   | UKY (Derivation) |                  |                  |                  | UTSW (Validation) |                  |                  |                  |
|-----------------------------------|------------------|------------------|------------------|------------------|-------------------|------------------|------------------|------------------|
|                                   | LR               | RF               | SVM              | XGBoost          | LR                | RF               | SVM              | XGBoost          |
| <b>A. Hospital Mortality</b>      |                  |                  |                  |                  |                   |                  |                  |                  |
| <b>AUC</b>                        | 0.77(0.77-0.77)  | 0.79 (0.79-0.80) | 0.77 (0.77-0.77) | 0.78 (0.78-0.78) | 0.77 (0.77-0.78)  | 0.74 (0.73-0.74) | 0.78 (0.77-0.79) | 0.70 (0.68-0.72) |
| <b>Diff vs. ref. (SOFA)#</b>      | 0.06             | 0.11             | 0.06             | 0.07             | 0.06              | 0.07             | 0.07             | -0.01            |
| <b>P value</b>                    | <0.001           | <0.001           | <0.001           | <0.001           | <0.001            | <0.001           | <0.001           | 0.370            |
| <b>Accuracy</b>                   | 0.72 (0.72-0.72) | 0.71 (0.71-0.71) | 0.72 (0.72-0.72) | 0.71 (0.71-0.71) | 0.64 (0.62-0.66)  | 0.65 (0.64-0.66) | 0.64 (0.62-0.66) | 0.62 (0.60-0.65) |
| <b>Precision</b>                  | 0.41 (0.41-0.42) | 0.41 (0.40-0.42) | 0.41 (0.41-0.42) | 0.41 (0.40-0.41) | 0.19 (0.18-0.19)  | 0.18 (0.17-0.18) | 0.19 (0.18-0.20) | 0.16 (0.15-0.17) |
| <b>Sensitivity</b>                | 0.67 (0.66-0.68) | 0.72 (0.72-0.73) | 0.67 (0.66-0.67) | 0.68 (0.68-0.69) | 0.77 (0.74-0.79)  | 0.69 (0.67-0.71) | 0.79 (0.76-0.81) | 0.67 (0.64-0.69) |
| <b>Specificity</b>                | 0.73 (0.73-0.74) | 0.71 (0.70-0.71) | 0.74 (0.73-0.74) | 0.72 (0.71-0.72) | 0.63 (0.60-0.65)  | 0.64 (0.63-0.65) | 0.62 (0.59-0.65) | 0.62 (0.59-0.65) |
| <b>F1</b>                         | 0.51 (0.51-0.52) | 0.52 (0.52-0.53) | 0.51 (0.51-0.52) | 0.51 (0.50-0.51) | 0.30 (0.29-0.31)  | 0.28 (0.27-0.29) | 0.30 (0.29-0.31) | 0.26 (0.25-0.28) |
| <b>PPV</b>                        | 0.41 (0.41-0.42) | 0.41 (0.40-0.42) | 0.41 (0.41-0.42) | 0.41 (0.40-0.41) | 0.19 (0.18-0.19)  | 0.18 (0.17-0.18) | 0.19 (0.18-0.20) | 0.16 (0.15-0.17) |
| <b>NPV</b>                        | 0.89 (0.89-0.89) | 0.90 (0.90-0.90) | 0.89 (0.89-0.89) | 0.89 (0.89-0.89) | 0.96 (0.96-0.96)  | 0.95 (0.95-0.95) | 0.96 (0.96-0.97) | 0.94 (0.94-0.95) |
| <b>B. MAKE</b>                    |                  |                  |                  |                  |                   |                  |                  |                  |
| <b>AUC</b>                        | 0.77 (0.76-0.77) | 0.78 (0.78-0.78) | 0.77 (0.76-0.77) | 0.77 (0.77-0.77) | 0.73 (0.73-0.73)  | 0.73 (0.72-0.74) | 0.74 (0.74-0.74) | 0.72 (0.71-0.72) |
| <b>Diff vs. ref. (max KDIGO)#</b> | 0.11             | 0.13             | 0.11             | 0.11             | 0.06              | 0.07             | 0.07             | 0.05             |
| <b>P value</b>                    | <0.001           | <0.001           | <0.001           | <0.001           | <0.001            | <0.001           | <0.001           | <0.001           |
| <b>Accuracy</b>                   | 0.71 (0.71-0.72) | 0.72 (0.71-0.72) | 0.71 (0.71-0.72) | 0.71 (0.71-0.72) | 0.71 (0.70-0.72)  | 0.67 (0.66-0.69) | 0.72 (0.70-0.73) | 0.65 (0.63-0.68) |
| <b>Precision</b>                  | 0.55 (0.54-0.56) | 0.55 (0.54-0.56) | 0.55 (0.54-0.55) | 0.55 (0.54-0.55) | 0.45 (0.44-0.47)  | 0.42 (0.40-0.43) | 0.46 (0.45-0.48) | 0.40 (0.38-0.42) |
| <b>Sensitivity</b>                | 0.66 (0.65-0.67) | 0.69 (0.69-0.70) | 0.66 (0.65-0.66) | 0.67 (0.66-0.67) | 0.56 (0.53-0.59)  | 0.67 (0.64-0.69) | 0.58 (0.55-0.62) | 0.66 (0.62-0.71) |
| <b>Specificity</b>                | 0.74 (0.74-0.74) | 0.73 (0.72-0.73) | 0.74 (0.74-0.74) | 0.73 (0.73-0.74) | 0.76 (0.74-0.79)  | 0.68 (0.64-0.71) | 0.76 (0.74-0.79) | 0.65 (0.60-0.71) |
| <b>F1</b>                         | 0.60 (0.59-0.61) | 0.61 (0.61-0.62) | 0.60 (0.59-0.60) | 0.60 (0.59-0.60) | 0.50 (0.49-0.51)  | 0.51 (0.50-0.52) | 0.51 (0.51-0.52) | 0.50 (0.49-0.51) |
| <b>PPV</b>                        | 0.55 (0.54-0.56) | 0.55 (0.54-0.56) | 0.55 (0.54-0.55) | 0.55 (0.54-0.55) | 0.45 (0.44-0.47)  | 0.42 (0.40-0.43) | 0.46 (0.45-0.48) | 0.40 (0.38-0.42) |
| <b>NPV</b>                        | 0.82 (0.82-0.82) | 0.83 (0.83-0.83) | 0.82 (0.82-0.82) | 0.82 (0.82-0.82) | 0.83 (0.83-0.84)  | 0.85 (0.85-0.86) | 0.84 (0.83-0.85) | 0.85 (0.84-0.86) |

#The difference in AUC was computed between the clinical model and the reference model using the same machine learning method in each corresponding column. Abbreviations: AUC (area under the curve), F1 (F1 score), KDIGO (Kidney Disease: Improving Global Outcomes), LR (logistic regression) MAKE (major adverse kidney events), NPV (negative predictive value), PPV (positive predictive value), RF (random forest), SOFA (sequential organ failure assessment score), SVM (Support Vector Machine), XGBoost (extreme gradient boosting), UKY (University of Kentucky), UTSW (University of Texas Southwestern).

**Table S4.** MAKE outcome and its components in the 120 days following hospital discharge in both cohorts.

|                                                                            | <b>UKY<br/>n = 7354</b> | <b>UTSW<br/>n = 2233</b> |
|----------------------------------------------------------------------------|-------------------------|--------------------------|
| Hospital mortality, n (%)                                                  | 1612 (21.9)             | 222 (9.9)                |
| Hospital mortality + mortality up to 120 days in hospital survivors, n (%) | 1959 (26.6)             | 369 (16.5)               |
| On KRT within the last 48h of hospitalization*, n (%)                      | 199 (2.7)               | 78 (3.5)                 |
| ESKD by USRDS after discharge*, n (%)                                      | 109 (1.5)               | 80 (3.6)                 |
| eGFR drop of 50%#, n (%)                                                   | 179 (2.4)               | 79 (3.5)                 |
| Total (MAKE) , n (%)                                                       | 2382 (32.4)             | 574 (25.7)               |

\*Patients considered KRT dependent can be included in these 2 categories

#Only for patients not considered KRT dependent

*Abbreviations: eGFR (estimated glomerular filtration rate), ESKD (end-stage kidney disease), KRT (kidney replacement therapy), MAKE (major adverse kidney events), USRDS (United States Renal Data System).*

**Table S5.** Final features included in the clinical model of hospital mortality in alphabetical order. Data are presented as n (percentage) or median (interquartile range).

| Features           | UKY<br>(Derivation Cohort) |                       |                         | UTSW<br>(Validation Cohort) |                       |                         |
|--------------------|----------------------------|-----------------------|-------------------------|-----------------------------|-----------------------|-------------------------|
|                    | Survived<br>n = 5742       | Died<br>n = 1612      | Mean Abs.<br>SHAP Score | Survived<br>n = 2011        | Died<br>n = 222       | Mean Abs.<br>SHAP Score |
| Age                | 62.92 [51.21-73.50]        | 63.49 [52.92-73.81]   | 0.009                   | 64.05 [53.87-73.75]         | 63.11 [53.41-73.08]   | 0.008                   |
| Bilirubin (High)   | 0.80 [0.50-1.60]           | 1.30 [0.60-3.10]      | 0.011                   | 0.80 [0.50-1.80]            | 1.45 [0.70-3.62]      | 0.011                   |
| BUN (High)         | 37.00 [25.00-55.00]        | 47.00 [31.00-66.00]   | 0.018                   | 30.00 [21.00-46.00]         | 44.00 [27.00-68.00]   | 0.020                   |
| ECMO               | 42 (0.73)                  | 59 (3.66)             | 0.001                   | 5 (0.25)                    | 7 (3.15)              | 0.001                   |
| FiO2 (High)        | 60 [50 -100]               | 100 [60 -100]         | 0.045                   | 45 [27-60]                  | 75 [40-100]           | 0.040                   |
| Heart Rate (High)  | 116 [101-133]              | 125 [109-141]         | 0.007                   | 109 [96-125]                | 122 [107-136]         | 0.006                   |
| Hours in ICU       | 75.95 [58.28-82.87]        | 79.02 [72.77-86.35]   | 0.012                   | 75.32 [51.22-81.08]         | 80.53 [76.3-86.46]    | 0.011                   |
| Last KDIGO         |                            |                       |                         |                             |                       |                         |
| Stage 0            | 2296 (39.99)               | 345 (21.40)           | 0.010                   | 814 (40.48)                 | 58 (26.13)            | 0.011                   |
| Stage 1            | 1710 (29.78)               | 379 (23.51)           |                         | 669 (33.27)                 | 51 (22.97)            |                         |
| Stage 2            | 784 (13.65)                | 301 (18.67)           |                         | 235 (11.69)                 | 30 (13.51)            |                         |
| Stage 3            | 952 (16.58)                | 587 (36.41)           |                         | 293 (14.57)                 | 83 (37.39)            |                         |
| Maximum KDIGO      |                            |                       |                         |                             |                       |                         |
| Stage 1            | 2984 (51.97)               | 580 (35.98)           | 0.0003                  | 1201 (59.72)                | 90 (40.54)            | 0.0002                  |
| Stage 2            | 1401 (24.40)               | 385 (23.88)           |                         | 414 (20.59)                 | 43 (19.37)            |                         |
| Stage 3            | 1357 (23.63)               | 647 (40.14)           |                         | 396 (19.69)                 | 89 (40.09)            |                         |
| pH (Low)           | 7.29 [7.22-7.36]           | 7.25 [7.15-7.35]      | 0.008                   | 7.33 [7.26-7.39]            | 7.32 [7.26-7.38]      | 0.007                   |
| Platelets (Low)    | 154.00 [103.00-214.00]     | 118.00 [60.00-188.00] | 0.021                   | 148.00 [97.00-207.00]       | 113.00 [64.00-185.75] | 0.017                   |
| Temperature (High) | 37.78 [37.28-38.39]        | 37.89 [37.28-38.67]   | 0.005                   | 37.39 [37.00-37.94]         | 37.39 [36.94-37.94]   | 0.004                   |
| Temperature (Low)  | 36.28 [35.72-36.50]        | 35.89 [35.17-36.39]   | 0.016                   | 36.17 [35.89-36.50]         | 36.06 [35.67-36.39]   | 0.013                   |
| Urine Output       | 74.77 [46.13-116.23]       | 49.53 [21.32-86.43]   | 0.051                   | 61.96 [41.27-92.33]         | 46.05 [20.60-69.28]   | 0.042                   |
| Pressor/inotrope   | 909 (15.83)                | 659 (40.88)           | 0.066                   | 258 (13.36)                 | 69 (31.22)            | 0.064                   |

Abbreviations: BUN (blood urea nitrogen), ECMO (extracorporeal membrane oxygenation), FiO<sub>2</sub> (fraction of inspired oxygen), ICU (intensive care unit), KDIGO (Kidney Disease: Improving Global Outcomes), SHAP (shapley additive explanations), UKY (University of Kentucky), UTSW (University of Texas Southwestern)

**Table S6.** Reclassification of hospital mortality prediction comparing the proposed clinical model vs. SOFA and APACHE-II models.

|                                 |                     | <b>Clinical Model</b>  |           |           |                |
|---------------------------------|---------------------|------------------------|-----------|-----------|----------------|
|                                 |                     | <b>SOFA model</b>      | 0.0 - 0.5 | 0.5 - 1.0 | % Reclassified |
| <b>Derivation cohort (UKY)</b>  | Survived (n = 5742) | 0.0 - 0.5              | 3148      | 517       | 14             |
|                                 |                     | 0.5 - 1.0              | 912       | 1165      | 44             |
|                                 | Died (n = 1612)     | 0.0 - 0.5              | 288       | 233       | 45             |
|                                 |                     | 0.5 - 1.0              | 153       | 938       | 14             |
| <b>Validation cohort (UTSW)</b> | Survived (n = 2011) | 0.0 - 0.5              | 1129      | 371       | 25             |
|                                 |                     | 0.5 - 1.0              | 180       | 331       | 35             |
|                                 | Died (n = 222)      | 0.0 - 0.5              | 47        | 52        | 53             |
|                                 |                     | 0.5 - 1.0              | 20        | 103       | 16             |
|                                 |                     | <b>Clinical Model</b>  |           |           |                |
|                                 |                     | <b>APACHE-II model</b> | 0.0 - 0.5 | 0.5 - 1.0 | % Reclassified |
| <b>Derivation cohort (UKY)</b>  | Survived (n = 5742) | 0.0 - 0.5              | 3125      | 611       | 16             |
|                                 |                     | 0.5 - 1.0              | 935       | 1071      | 47             |
|                                 | Died (n = 1612)     | 0.0 - 0.5              | 275       | 319       | 54             |
|                                 |                     | 0.5 - 1.0              | 166       | 852       | 16             |
| <b>Validation cohort (UTSW)</b> | Survived (n = 2011) | 0.0 - 0.5              | 844       | 215       | 20             |
|                                 |                     | 0.5 - 1.0              | 465       | 487       | 49             |
|                                 | Died (n = 222)      | 0.0 - 0.5              | 32        | 34        | 52             |
|                                 |                     | 0.5 - 1.0              | 35        | 121       | 22             |

**Table S7.** Final features included in the clinical model of MAKE in alphabetical order. Data are presented as n (percentage) or median (interquartile range).

| Features           | UKY (Derivation Cohort) |                        |                         | UTSW (Validation Cohort) |                        |                            |
|--------------------|-------------------------|------------------------|-------------------------|--------------------------|------------------------|----------------------------|
|                    | No MAKE<br>n = 4972     | MAKE<br>n = 2382       | Mean Abs.<br>SHAP Score | No MAKE<br>n = 1659      | MAKE<br>n = 574        | Mean Abs.<br>SHAP<br>Score |
| Age                | 62.56 [50.89-73.28]     | 63.98 [53.17-74.13]    | 0.017                   | 64.16 [53.95-73.97]      | 63.36 [53.47-72.62]    | 0.016                      |
| Bilirubin (High)   | 0.80 [0.50-1.50]        | 1.10 [0.60-2.70]       | 0.012                   | 0.80 [0.50-1.60]         | 1.20 [0.60-3.20]       | 0.012                      |
| BUN (High)         | 35.00 [25.00-52.00]     | 48.00 [32.00-69.00]    | 0.024                   | 28.00 [20.00-42.00]      | 41.00 [28.00-66.00]    | 0.025                      |
| FiO2 (High)        | 60 [50-100]             | 100 [60-100]           | 0.045                   | 40 [27-60]               | 50 [30-100]            | 0.041                      |
| Heart Rate (High)  | 116 [101-133]           | 121 [105-139]          | 0.005                   | 109 [96-125]             | 114 [98-130.75]        | 0.005                      |
| Hemoglobin (Low)   | 9.40 [7.80-11.20]       | 8.50 [7.20-10.40]      | 0.010                   | 9.40 [8.10-11.10]        | 8.50 [7.30-10.20]      | 0.008                      |
| ICU admission sCr  | 1.51 [1.11-2.15]        | 1.81 [1.27-2.70]       | 0.004                   | 1.37 [0.97-1.98]         | 1.77 [1.15-2.90]       | 0.003                      |
| Last KDIGO         |                         |                        |                         |                          |                        |                            |
| Stage 0            | 2170 (43.64)            | 471 (19.77)            | 0.110                   | 742 (44.73)              | 130 (22.65)            | 0.112                      |
| Stage 1            | 1552 (31.21)            | 537 (22.54)            |                         | 575 (34.66)              | 145 (25.26)            |                            |
| Stage 2            | 651 (13.09)             | 434 (18.22)            |                         | 184 (11.09)              | 81 (14.11)             |                            |
| Stage 3            | 599 (12.05)             | 940 (39.46)            |                         | 158 (9.52)               | 218 (37.98)            |                            |
| Maximum KDIGO      |                         |                        |                         |                          |                        |                            |
| Stage 1            | 2782 (55.95)            | 782 (32.83)            | 0.001                   | 1074 (64.74)             | 217 (37.80)            | 0.001                      |
| Stage 2            | 1228 (24.70)            | 558 (23.43)            |                         | 343 (20.68)              | 114 (19.86)            |                            |
| Stage 3            | 962 (19.35)             | 1042 (43.74)           |                         | 242 (14.59)              | 243 (42.33)            |                            |
| pH (Low)           | 7.30 [7.22-7.36]        | 7.26 [7.16-7.36]       | 0.007                   | 7.33 [7.27-7.39]         | 7.31 [7.23-7.40]       | 0.006                      |
| Platelets (Low)    | 154.00 [105.00-214.00]  | 128.00 [68.00-197.00]  | 0.021                   | 151.00 [102.00-208.00]   | 124.00 [64.00-194.00]  | 0.018                      |
| Serum Sodium (Low) | 137.00 [134.00-140.00]  | 137.00 [134.00-140.00] | 0.004                   | 136.00 [133.00-139.00]   | 136.00 [132.00-140.00] | 0.003                      |
| Urine Output       | 77.88 [50.04-119.97]    | 51.39 [22.41-88.63]    | 0.050                   | 64.68 [43.72-94.18]      | 48.54 [21.17-75.82]    | 0.040                      |
| Pressor/inotrope   | 721 (14.50)             | 847 (35.56)            | 0.028                   | 203 (12.79)              | 124 (21.95)            | 0.028                      |

Abbreviations: BUN (blood urea nitrogen), ECMO (extracorporeal membrane oxygenation), FiO<sub>2</sub> (fraction of inspired oxygen), ICU (intensive care unit), KDIGO (Kidney Disease: Improving Global Outcomes), SHAP (shapley additive explanations), UKY (University of Kentucky), UTSW (University of Texas Southwestern)

**Table S8.** Reclassification of MAKE prediction comparing the proposed clinical model vs. maximum AKI KDIGO model.

|                                 |                    | <b>Clinical Model</b> |           |           |                |
|---------------------------------|--------------------|-----------------------|-----------|-----------|----------------|
|                                 |                    | <b>AKI KDIGO</b>      | 0.0 - 0.5 | 0.5 - 1.0 | % Reclassified |
| <b>Derivation cohort (UKY)</b>  | No MAKE (n = 4972) | 0.0 - 0.5             | 2592      | 430       | 14             |
|                                 |                    | 0.5 - 1.0             | 1056      | 894       | 54             |
|                                 | MAKE (n = 2382)    | 0.0 - 0.5             | 479       | 410       | 46             |
|                                 |                    | 0.5 - 1.0             | 242       | 1251      | 16             |
| <b>Validation cohort (UTSW)</b> | No MAKE (n = 1659) | 0.0 - 0.5             | 888       | 186       | 17             |
|                                 |                    | 0.5 - 1.0             | 281       | 304       | 48             |
|                                 | MAKE (n = 574)     | 0.0 - 0.5             | 125       | 92        | 42             |
|                                 |                    | 0.5 - 1.0             | 63        | 294       | 18             |



**Table S9.** Reclassification of MAKE prediction comparing the proposed clinical model vs. maximum AKI KDIGO model in the subset of survivors up to 120 days after hospital discharge.

|                                 |                    | AKI KDIGO | Clinical Model |           |                |
|---------------------------------|--------------------|-----------|----------------|-----------|----------------|
|                                 |                    |           | 0.0 - 0.5      | 0.5 - 1.0 | % Reclassified |
| <b>Derivation cohort (UKY)</b>  | No MAKE (n = 4972) | 0.0 - 0.5 | 3722           | 288       | 7              |
|                                 |                    | 0.5 - 1.0 | 264            | 698       | 27             |
|                                 | MAKE (n = 423)     | 0.0 - 0.5 | 98             | 36        | 27             |
|                                 |                    | 0.5 - 1.0 | 5              | 284       | 2              |
| <b>Validation cohort (UTSW)</b> | No MAKE (n = 1659) | 0.0 - 0.5 | 1395           | 22        | 2              |
|                                 |                    | 0.5 - 1.0 | 72             | 170       | 30             |
|                                 | MAKE (n = 205)     | 0.0 - 0.5 | 80             | 7         | 8              |
|                                 |                    | 0.5 - 1.0 | 5              | 113       | 4              |

**Table S10.** Predictive performance of models for hospital mortality and MAKE prediction stratified by CKD patients (Panel A: CKD defined by baseline eGFR < or ≥60; Panel B: CKD defined by ICD 9/10 codes).

|             | Model for Hospital Mortality      |                                   |                                    |                                   | Model for MAKE                   |                                  |                                   |                                   |
|-------------|-----------------------------------|-----------------------------------|------------------------------------|-----------------------------------|----------------------------------|----------------------------------|-----------------------------------|-----------------------------------|
| Panel A.    | Baseline eGFR <60                 |                                   | Baseline eGFR ≥60                  |                                   | Baseline eGFR <60                |                                  | Baseline eGFR ≥60                 |                                   |
|             | UKY<br>Death N (%)<br>491 (22.32) | UKY<br>Death N (%)<br>491 (22.32) | UKY<br>Death N (%)<br>1121 (21.75) | UTSW<br>Death N (%)<br>131 (9.66) | UKY<br>MAKE N (%)<br>223 (36.92) | UKY<br>MAKE N (%)<br>223 (36.92) | UKY<br>MAKE N (%)<br>2159 (31.99) | UTSW<br>MAKE N (%)<br>450 (25.08) |
| AUC         | 0.81(0.79-0.82)                   | 0.74(0.73-0.75)                   | 0.79(0.79-0.79)                    | 0.73(0.73-0.74)                   | 0.79(0.78-0.80)                  | 0.70(0.68-0.71)                  | 0.78(0.78-0.78)                   | 0.74(0.73-0.75)                   |
| Accuracy    | 0.70(0.69-0.71)                   | 0.61(0.59-0.63)                   | 0.71(0.71-0.72)                    | 0.66(0.65-0.67)                   | 0.72(0.71-0.72)                  | 0.63(0.61-0.65)                  | 0.72(0.71-0.72)                   | 0.69(0.67-0.70)                   |
| Precision   | 0.43(0.41-0.45)                   | 0.18(0.17-0.19)                   | 0.41(0.40-0.41)                    | 0.17(0.17-0.18)                   | 0.59(0.58-0.60)                  | 0.40(0.39-0.42)                  | 0.55(0.54-0.55)                   | 0.42(0.41-0.44)                   |
| Sensitivity | 0.80(0.77-0.82)                   | 0.75(0.72-0.79)                   | 0.71(0.71-0.72)                    | 0.67(0.65-0.69)                   | 0.73(0.71-0.74)                  | 0.68(0.65-0.70)                  | 0.69(0.69-0.70)                   | 0.66(0.64-0.69)                   |
| Specificity | 0.67(0.66-0.68)                   | 0.59(0.57-0.61)                   | 0.71(0.71-0.72)                    | 0.65(0.64-0.67)                   | 0.71(0.70-0.72)                  | 0.61(0.57-0.64)                  | 0.73(0.72-0.73)                   | 0.69(0.66-0.72)                   |
| F1          | 0.55(0.53-0.57)                   | 0.29(0.28-0.30)                   | 0.52(0.51-0.52)                    | 0.28(0.27-0.28)                   | 0.65(0.64-0.66)                  | 0.51(0.49-0.52)                  | 0.61(0.60-0.61)                   | 0.51(0.50-0.52)                   |
| Panel B.    | CKD by ICD codes                  |                                   | No CKD by ICD codes                |                                   | CKD by ICD codes                 |                                  | No CKD by ICD codes               |                                   |
|             | UKY<br>Death N (%)<br>491 (22.32) | UKY<br>Death N (%)<br>491 (22.32) | UKY<br>Death N (%)<br>1121 (21.75) | UTSW<br>Death N (%)<br>131 (9.66) | UKY<br>MAKE N (%)<br>892 (40.55) | UTSW<br>MAKE N (%)<br>285 (32.5) | UKY<br>MAKE N (%)<br>1490 (28.91) | UTSW<br>MAKE N (%)<br>289 (21.31) |
| AUC         | 0.76(0.75-0.76)                   | 0.76(0.75-0.76)                   | 0.81(0.80-0.81)                    | 0.76(0.75-0.77)                   | 0.75(0.74-0.75)                  | 0.69(0.68-0.70)                  | 0.79(0.79-0.79)                   | 0.75(0.74-0.76)                   |
| Accuracy    | 0.66(0.65-0.67)                   | 0.66(0.65-0.67)                   | 0.73(0.73-0.74)                    | 0.67(0.66-0.68)                   | 0.66(0.65-0.67)                  | 0.62(0.61-0.63)                  | 0.74(0.74-0.74)                   | 0.71(0.69-0.73)                   |
| Precision   | 0.37(0.36-0.38)                   | 0.37(0.36-0.38)                   | 0.43(0.42-0.44)                    | 0.19(0.18-0.19)                   | 0.56(0.55-0.57)                  | 0.45(0.43-0.46)                  | 0.54(0.54-0.55)                   | 0.39(0.37-0.41)                   |
| Sensitivity | 0.73(0.72-0.74)                   | 0.73(0.72-0.74)                   | 0.72(0.71-0.72)                    | 0.70(0.68-0.72)                   | 0.76(0.75-0.76)                  | 0.68(0.65-0.71)                  | 0.66(0.65-0.66)                   | 0.65(0.62-0.67)                   |
| Specificity | 0.64(0.63-0.65)                   | 0.64(0.63-0.65)                   | 0.74(0.73-0.74)                    | 0.67(0.66-0.68)                   | 0.59(0.58-0.60)                  | 0.59(0.56-0.62)                  | 0.78(0.77-0.78)                   | 0.72(0.69-0.76)                   |
| F1          | 0.49(0.48-0.50)                   | 0.49(0.48-0.50)                   | 0.54(0.53-0.54)                    | 0.29(0.28-0.30)                   | 0.64(0.64-0.65)                  | 0.54(0.53-0.55)                  | 0.59(0.59-0.60)                   | 0.49(0.48-0.50)                   |
